# Supplementary material for: Patient-specific models link neurotransmitter receptor mechanisms with motor and visuospatial axes of Parkinson’s disease
Source: PubMed Central journal article supplement (PMC10522603; doi:10.1038/s41467-023-41677-w), 2023-09-26
Supplement: 41467_2023_41677_MOESM1_ESM.pdf [file 41467_2023_41677_MOESM1_ESM.pdf]

## **Patient-specific models link neurotransmitter receptor mechanisms with motor and visuospatial axes of Parkinson's disease**

Ahmed Faraz Khan<sup>1,2,3</sup>, Quadri Adewale<sup>1,2,3</sup>, Sue-Jin Lin<sup>1,2,3</sup>, Tobias R. Baumeister<sup>1,2,3</sup>, Yashar Zeighami<sup>1,4</sup>, Felix Carbonell<sup>5</sup>, Nicola Palomero-Gallagher<sup>6,7,8</sup>, Yasser Iturria-Medina<sup>1,2,3\*</sup>

<sup>1</sup>Department of Neurology and Neurosurgery, Montreal Neurological Institute, McGill University, Montreal, Quebec, Canada

<sup>2</sup>McConnell Brain Imaging Center, Montreal Neurological Institute, Montreal, Canada

<sup>3</sup>Ludmer Centre for Neuroinformatics & Mental Health, Montreal, Canada

<sup>4</sup>Douglas Research Centre, Department of Psychiatry, McGill University, Montreal, Canada

<sup>5</sup>Biospective Inc., Montreal, Canada

<sup>6</sup>Institute of Neuroscience and Medicine (INM-1), Research Centre Jülich, Jülich, Germany

<sup>7</sup>Cécile and Oskar Vogt Institute of Brain Research, Medical Faculty, Heinrich-Heine University, Düsseldorf, Germany

<sup>8</sup>Department of Psychiatry, Psychotherapy, and Psychosomatics, Medical Faculty, RWTH Aachen, and JARA - Translational Brain Medicine, Aachen, Germany

\* Correspondence to: Y I-M, 3801 University Street, room NW312, Montreal Neurological Institute, McGill University, Montreal, Canada H3A 2B4. Email: [yasser.iturriamedina@mcgill.ca](mailto:yasser.iturriamedina@mcgill.ca)

**Supplementary Table S1:** *Summary of demographic data for N=71 PD patients.*

| <b>Category</b>                      | <b>PD subjects</b> |
|--------------------------------------|--------------------|
| <b>Mean MDS-UPDRS Part III score</b> | 18.8 ± 8.7         |
| <b>Female patients</b>               | 20 (28.2%)         |
| <b>Mean age (years)</b>              | 59.6 ± 9.8         |
| <b>Mean education (years)</b>        | 15.5 ± 2.8         |
| <b>Non-white patients</b>            | 0                  |
| <b>Right handed patients</b>         | 64 (90.1%)         |

**Supplementary Table S2:** *Mean and standard deviation of the number of clinical evaluations per subject.*

| <b>Category</b> | <b>Number of evaluations</b> |
|-----------------|------------------------------|
| <b>BJLOT</b>    | 7.62 ± 1.13                  |
| <b>GDS</b>      | 8.27 ± 1.09                  |
| <b>HVLT</b>     | 7.65 ± 1.14                  |
| <b>LNS</b>      | 7.63 ± 1.12                  |
| <b>LXF</b>      | 0.79 ± 0.56                  |
| <b>NP1</b>      | 15.0 ± 1.9                   |
| <b>NP2</b>      | 15.0 ± 1.9                   |
| <b>NP3</b>      | 19.5 ± 4.0                   |
| <b>NP4</b>      | 9.94 ± 3.0                   |
| <b>MoCA</b>     | 7.63 ± 1.12                  |
| <b>SF</b>       | 7.62 ± 1.11                  |
| <b>STAIAD</b>   | 8.28 ± 1.08                  |
| <b>SDM</b>      | 7.66 ± 1.15                  |

**Supplementary Table S3:** *Neurotransmitter receptor ligands used to obtain receptor maps.*

| <b>Neurotransmitter</b> | <b>Receptor</b>                                                                   | <b>Ligand</b>                    | <b>Type</b> |
|-------------------------|-----------------------------------------------------------------------------------|----------------------------------|-------------|
| <b>Glutamate</b>        | AMPA                                                                              | [ <sup>3</sup> H]-AMPA           | Agonist     |
|                         | NMDA                                                                              | [ <sup>3</sup> H]-MK-801         | Antagonist  |
|                         | Kainate                                                                           | [ <sup>3</sup> H]-Kainate        | Agonist     |
| <b>GABA</b>             | GABA <sub>A</sub>                                                                 | [ <sup>3</sup> H]-Muscimol       | Agonist     |
|                         | GABA <sub>B</sub>                                                                 | [ <sup>3</sup> H]-CGP 54626      | Antagonist  |
|                         | GABA <sub>A</sub> -associated benzodiazepine binding site (GABA <sub>A</sub> /BZ) | [ <sup>3</sup> H]-Flumazenil     | Antagonist  |
| <b>Acetylcholine</b>    | M <sub>1</sub>                                                                    | [ <sup>3</sup> H]-Pirenzepine    | Antagonist  |
|                         | M <sub>2</sub>                                                                    | [ <sup>3</sup> H]-Oxotremorine-M | Agonist     |
|                         | M <sub>3</sub>                                                                    | [ <sup>3</sup> H]-4-DAMP         | Antagonist  |
|                         | Nicotinic $\alpha_4\beta_2$                                                       | [ <sup>3</sup> H]-Epibatidine    | Agonist     |
| <b>Noradrenaline</b>    | $\alpha_1$                                                                        | [ <sup>3</sup> H]-Prazosin       | Antagonist  |
|                         | $\alpha_2$                                                                        | [ <sup>3</sup> H]-RX 821002      | Antagonist  |
| <b>Serotonin</b>        | 5-HT <sub>1A</sub>                                                                | [ <sup>3</sup> H]-8-OH-DPAT      | Agonist     |
|                         | 5-HT <sub>2</sub>                                                                 | [ <sup>3</sup> H]-Ketanserin     | Antagonist  |
| <b>Dopamine</b>         | D <sub>1</sub>                                                                    | [ <sup>3</sup> H]-SCH 23390      | Antagonist  |

**Supplementary Table S4:** *Brain regions with receptor data, and the corresponding atlas used to extract the ROI map. Note that regions are defined by cytoarchitecture, and thus do not correspond perfectly with functional regions.*

| <b>Lobe</b>              | <b>Anatomical subdivision</b> | <b>Jülich area</b>   | <b>Region name</b>               | <b>Atlas source</b> |
|--------------------------|-------------------------------|----------------------|----------------------------------|---------------------|
| <b>Occipital lobe</b>    | Visual cortex                 | hOc1                 | Brodmann's area 17 / V1          | Jülich              |
|                          |                               | hOc2                 | Brodmann's area 18 / V2          | Jülich              |
|                          |                               | hOc4d                | V4                               | Jülich              |
|                          |                               | hOc3a                | V3a                              | Jülich              |
|                          |                               | hOc3d                | V3d                              | Jülich              |
|                          |                               | hOc3v                | V3v                              | Jülich              |
|                          |                               | hOc4v                | V4                               | Jülich              |
|                          | Extrastriate cortex           | FG1                  | Part of Brodmann area 19         | Jülich              |
|                          |                               | FG2                  | Part of Brodmann area 19         | Jülich              |
|                          | <b>Parietal lobe</b>          | Somatosensory cortex | 1                                | Brodmann's area 1   |
| 2                        |                               |                      | Brodmann's area 2                | Jülich              |
| 3a                       |                               |                      | Brodmann's area 3a               | Jülich              |
| 3b                       |                               |                      | Brodmann's area 3b               | Jülich              |
| Superior parietal lobule |                               | 5L                   | Brodmann's area 5L               | Jülich              |
|                          |                               | 5M                   | Brodmann's area 5M               | Jülich              |
|                          |                               | 7A                   | Brodmann's area 7A               | Jülich              |
| Inferior parietal lobule |                               | PGa                  | Anterior inferior parietal area  | Jülich              |
|                          |                               | PGp                  | Posterior inferior parietal area | Jülich              |
|                          |                               | PFt                  | Temporal inferior parietal       | Jülich              |

Supplementary Information

|                      |                     |                           |                                              |                  |
|----------------------|---------------------|---------------------------|----------------------------------------------|------------------|
|                      |                     |                           | area                                         |                  |
|                      |                     | PFm                       | Medial inferior parietal area                | Jülich           |
| <b>Temporal lobe</b> | Auditory cortex     | Te1                       | Temporal area 1 (part of Brodmann's area 41) | Jülich           |
|                      |                     | Te2                       | Temporal area 2 (part of Brodmann's area 41) | Jülich           |
|                      | Hippocampus         | CA                        | Cornu ammonis                                | Jülich           |
|                      |                     | DG                        | Dentate gyrus                                | Jülich           |
|                      | Subiculum           | Subiculum                 | Subiculum                                    | Jülich           |
|                      | Entorhinal cortex   | Ent                       | Brodman's area 28                            | Jülich           |
|                      |                     | 20                        | Brodman's area 20                            | Brodman          |
|                      |                     | 21                        | Brodman's area 21                            | Brodman          |
|                      |                     | 22                        | Brodman's area 22                            | Brodman          |
|                      |                     | 36                        | Brodman's area 36                            | Brodman          |
|                      |                     | 37                        | Brodman's area 37                            | Brodman          |
|                      |                     | 38                        | Brodman's area 38                            | Brodman          |
|                      | <b>Frontal lobe</b> | Agranular premotor cortex | 6                                            | Brodman's area 6 |
| Primary motor cortex |                     | 4p                        | Brodman's area 4p                            | Jülich           |
| Broca's region       |                     | 44                        |                                              | Jülich           |
|                      |                     | 45                        |                                              | Jülich           |
| Frontopolar cortex   |                     | Fp1                       | Frontopolar area (part of Brodmann area 10)  | Jülich           |
|                      |                     | Fp2                       | Frontopolar area (part of Brodmann area      | Jülich           |

Supplementary Information

|                                           |                      |                     |                                               |         |
|-------------------------------------------|----------------------|---------------------|-----------------------------------------------|---------|
|                                           |                      |                     | 10)                                           |         |
|                                           | Orbitofrontal cortex | Fo1                 | Orbitofrontal area (part of Brodmann area 11) | Jülich  |
|                                           | Lateral prefrontal   | 46                  | Brodman's area 46                             | Brodman |
|                                           |                      | 47                  | Brodman's area 47                             | Brodman |
|                                           |                      | 8                   | Brodman's area 8                              | Brodman |
|                                           |                      | 9                   | Brodman's area 9                              | Brodman |
| <b>Cingulate regions (multiple lobes)</b> | Anterior cingulate   | p24ab               | Pregenua cingulate areas p24a & p24b          | Jülich  |
|                                           |                      | p32                 | Pregenua cingulate area p32                   | Jülich  |
|                                           | Posterior cingulate  | 23                  | Brodman's area 23                             | Brodman |
|                                           |                      | 31                  | Brodman's area 31                             | Brodman |
| <b>Basal ganglia</b>                      | Striatum             | Putamen             | Putamen                                       | AAL     |
|                                           |                      | Caudate             | Caudate nucleus                               | AAL     |
|                                           | Pallidum             | Globus pallidus     | Globus pallidus                               | DISTAL  |
|                                           | Subthalamic nucleus  | STN                 | Subthalamic nucleus                           | DISTAL  |
| <b>Forebrain</b>                          | Thalamus             | Thalamus (anterior) | Thalamus (anterior)                           | AAL     |
|                                           |                      | Thalamus (medial)   | Thalamus (medial)                             | AAL     |
|                                           |                      | Thalamus (lateral)  | Thalamus (lateral)                            | AAL     |

**Supplementary Table S5:** *Biological parameters most correlated with clinical symptoms in PD via the primary component, and the percentage of clinical score covariance explained via this component.*

| <b>Neuroimaging Modality</b> | <b>Model Parameter</b>    | <b>Receptor Type</b> | <b>Explained Variance</b> |
|------------------------------|---------------------------|----------------------|---------------------------|
| GM                           | AMPA x fALLF              | Glutamatergic        | 0.12%                     |
|                              | GABA <sub>B</sub>         | GABAergic            | 0.18%                     |
|                              | $\alpha_4\beta_2$ x GM    | Cholinergic          | 0.31%                     |
|                              | M <sub>1</sub> x fALLF    | Cholinergic          | 0.10%                     |
|                              | M <sub>2</sub> x fALLF    | Cholinergic          | 0.31%                     |
|                              | $\alpha_4\beta_2$ x fALLF | Cholinergic          | 0.10%                     |
|                              | M <sub>3</sub> x FA       | Cholinergic          | 0.16%                     |
|                              | M <sub>1</sub> x t1/t2    | Cholinergic          | 0.12%                     |
|                              | M <sub>1</sub>            | Cholinergic          | 0.10%                     |
|                              | $\alpha_2$ x fALLF        | Adrenergic           | 0.42%                     |
|                              | 5HT <sub>1A</sub> x SPECT | Serotonergic         | 0.29%                     |
|                              | D <sub>1</sub> x fALLF    | Dopaminergic         | 0.29%                     |
|                              | GM                        | Non-Receptor         | 0.14%                     |
|                              | SPECT                     | Non-Receptor         | 0.20%                     |
| fALLF                        | Kainate x SPECT           | Glutamatergic        | 0.10%                     |
|                              | NMDA x FA                 | Glutamatergic        | 0.33%                     |
|                              | Kainate x t1/t2           | Glutamatergic        | 0.24%                     |
|                              | Bz site x GM              | GABAergic            | 0.31%                     |
|                              | GABA <sub>B</sub> x fALLF | GABAergic            | 0.29%                     |
|                              | GABA <sub>A</sub> x FA    | GABAergic            | 0.27%                     |
|                              | M <sub>2</sub> x FA       | Cholinergic          | 0.13%                     |
|                              | M <sub>1</sub>            | Cholinergic          | 0.18%                     |
|                              | M <sub>2</sub>            | Cholinergic          | 0.21%                     |
|                              | 5HT <sub>1A</sub> x t1/t2 | Serotonergic         | 0.08%                     |
|                              | D <sub>1</sub> x GM       | Dopaminergic         | 0.19%                     |
|                              | GM                        | Non-Receptor         | 0.16%                     |
| SPECT                        | Kainate x FA              | Glutamatergic        | 0.15%                     |
|                              | $\alpha_1$ x FA           | Adrenergic           | 0.12%                     |
|                              | 5HT <sub>2</sub> x GM     | Serotonergic         | 0.18%                     |
|                              | 5HT <sub>1A</sub> x MD    | Serotonergic         | 0.25%                     |
|                              | 5HT <sub>2</sub> x t1/t2  | Serotonergic         | 0.23%                     |
|                              | 5HT <sub>2</sub>          | Serotonergic         | 0.21%                     |
|                              | D <sub>1</sub> x FA       | Dopaminergic         | 0.14%                     |
|                              | D <sub>1</sub>            | Dopaminergic         | 0.21%                     |
|                              | FA                        | Non-Receptor         | 0.31%                     |
| MD                           | Non-Receptor              | 0.19%                |                           |

Supplementary Information

|                        |                           |               |               |
|------------------------|---------------------------|---------------|---------------|
| FA                     | Kainate x GM              | Glutamatergic | 0.22%         |
|                        | AMPA x t1/t2              | Glutamatergic | 0.13%         |
|                        | Kainate x t1/t2           | Glutamatergic | 0.18%         |
|                        | AMPA                      | Glutamatergic | 0.36%         |
|                        | Kainate                   | Glutamatergic | 0.28%         |
|                        | GABA <sub>A</sub> x MD    | GABAergic     | 0.20%         |
|                        | Bz site x t1/t2           | GABAergic     | 0.20%         |
|                        | GABA <sub>B</sub> x t1/t2 | GABAergic     | 0.30%         |
|                        | GABA <sub>A</sub>         | GABAergic     | 0.67%         |
|                        | M <sub>1</sub> x fALLF    | Cholinergic   | 0.15%         |
|                        | M <sub>3</sub> x MD       | Cholinergic   | 0.48%         |
|                        | $\alpha_4\beta_2$ x t1/t2 | Cholinergic   | 0.19%         |
|                        | $\alpha_2$ x GM           | Adrenergic    | 0.25%         |
|                        | $\alpha_2$ x MD           | Adrenergic    | 0.23%         |
|                        | $\alpha_1$ x t1/t2        | Adrenergic    | 0.16%         |
|                        | $\alpha_1$                | Adrenergic    | 0.13%         |
|                        | 5HT <sub>1A</sub> x SPECT | Serotonergic  | 0.08%         |
|                        | 5HT <sub>2</sub> x SPECT  | Serotonergic  | 0.18%         |
|                        | 5HT <sub>2</sub> x MD     | Serotonergic  | 0.17%         |
|                        | 5HT <sub>2</sub> x t1/t2  | Serotonergic  | 0.12%         |
|                        | GM                        | Non-Receptor  | 0.28%         |
|                        | SPECT                     | Non-Receptor  | 0.12%         |
|                        | MD                        | Non-Receptor  | 0.21%         |
|                        | t1/t2                     | Non-Receptor  | 0.23%         |
|                        | spreading                 | Non-Receptor  | 0.17%         |
|                        | MD                        | AMPA x fALLF  | Glutamatergic |
| Kainate x fALLF        |                           | Glutamatergic | 0.37%         |
| Kainate x FA           |                           | Glutamatergic | 0.20%         |
| NMDA x MD              |                           | Glutamatergic | 0.25%         |
| Kainate x MD           |                           | Glutamatergic | 0.38%         |
| GABA <sub>A</sub> x GM |                           | GABAergic     | 0.41%         |
| Bz site x fALLF        |                           | GABAergic     | 0.31%         |
| GABA <sub>B</sub> x MD |                           | GABAergic     | 0.11%         |
| GABA <sub>A</sub>      |                           | GABAergic     | 0.35%         |
| Bz site                |                           | GABAergic     | 0.50%         |
| M <sub>1</sub> x MD    |                           | Cholinergic   | 0.18%         |
| M <sub>1</sub>         |                           | Cholinergic   | 0.21%         |
| M <sub>2</sub>         |                           | Cholinergic   | 0.43%         |
| M <sub>3</sub>         |                           | Cholinergic   | 0.67%         |
| $\alpha_1$ x FA        |                           | Adrenergic    | 0.10%         |
| $\alpha_2$             |                           | Adrenergic    | 0.13%         |



Supplementary Information

|       |                           |               |       |
|-------|---------------------------|---------------|-------|
|       | 5HT <sub>1A</sub> x GM    | Serotonergic  | 0.12% |
|       | 5HT <sub>2</sub> x fALLF  | Serotonergic  | 0.54% |
|       | 5HT <sub>1A</sub> x FA    | Serotonergic  | 0.22% |
|       | 5HT <sub>2</sub>          | Serotonergic  | 0.45% |
|       | D <sub>1</sub> x FA       | Dopaminergic  | 0.15% |
|       | fALLF                     | Non-Receptor  | 0.29% |
|       | FA                        | Non-Receptor  | 0.24% |
| t1/t2 | AMPA x FA                 | Glutamatergic | 0.21% |
|       | NMDA x FA                 | Glutamatergic | 0.55% |
|       | NMDA                      | Glutamatergic | 0.38% |
|       | Kainate                   | Glutamatergic | 0.16% |
|       | Bz site x GM              | GABAergic     | 0.31% |
|       | GABA <sub>A</sub> x FA    | GABAergic     | 0.62% |
|       | Bz site x FA              | GABAergic     | 0.27% |
|       | Bz site x MD              | GABAergic     | 0.35% |
|       | Bz site x t1/t2           | GABAergic     | 0.13% |
|       | GABA <sub>B</sub> x t1/t2 | GABAergic     | 0.20% |
|       | M <sub>1</sub> x SPECT    | Cholinergic   | 0.21% |
|       | M <sub>1</sub> x FA       | Cholinergic   | 0.15% |
|       | M <sub>2</sub> x FA       | Cholinergic   | 0.08% |
|       | M <sub>1</sub> x t1/t2    | Cholinergic   | 0.13% |
|       | M <sub>3</sub> x t1/t2    | Cholinergic   | 0.18% |
|       | α <sub>2</sub> x fALLF    | Adrenergic    | 0.28% |
|       | α <sub>2</sub>            | Adrenergic    | 0.21% |
|       | 5HT <sub>2</sub> x GM     | Serotonergic  | 0.52% |
|       | 5HT <sub>2</sub> x SPECT  | Serotonergic  | 0.14% |
|       | D <sub>1</sub> x FA       | Dopaminergic  | 0.19% |
|       | offset                    | Non-Receptor  | 0.25% |
|       | FA                        | Non-Receptor  | 0.19% |

**Supplementary Table S6:** *Biological parameters most correlated with clinical symptoms in PD via the secondary component, and the percentage of clinical score covariance explained.*

| Neuroimaging Modality | Model Parameter | Receptor Type | Explained Variance |
|-----------------------|-----------------|---------------|--------------------|
| GM                    | NMDA x GM       | Glutamatergic | 0.06%              |
|                       | NMDA x SPECT    | Glutamatergic | 0.10%              |
|                       | NMDA x MD       | Glutamatergic | 0.05%              |
|                       | Kainate x MD    | Glutamatergic | 0.04%              |
|                       | AMPA            | Glutamatergic | 0.08%              |
|                       | NMDA            | Glutamatergic | 0.04%              |

Supplementary Information

|       |                           |               |       |
|-------|---------------------------|---------------|-------|
|       | GABA <sub>A</sub> x GM    | GABAergic     | 0.04% |
|       | GABA <sub>A</sub> x fALLF | GABAergic     | 0.09% |
|       | GABA <sub>A</sub> x FA    | GABAergic     | 0.05% |
|       | GABA <sub>A</sub> x MD    | GABAergic     | 0.05% |
|       | M <sub>1</sub> x fALLF    | Cholinergic   | 0.07% |
|       | M <sub>1</sub> x MD       | Cholinergic   | 0.19% |
|       | M <sub>3</sub>            | Cholinergic   | 0.08% |
|       | $\alpha_4\beta_2$         | Cholinergic   | 0.08% |
|       | $\alpha_2$ x SPECT        | Adrenergic    | 0.11% |
|       | $\alpha_1$                | Adrenergic    | 0.07% |
|       | 5HT <sub>2</sub> x FA     | Serotonergic  | 0.13% |
|       | 5HT <sub>2</sub>          | Serotonergic  | 0.06% |
|       | D <sub>1</sub> x GM       | Dopaminergic  | 0.10% |
|       | D <sub>1</sub> x MD       | Dopaminergic  | 0.07% |
|       | D <sub>1</sub>            | Dopaminergic  | 0.06% |
|       | offset                    | Non-Receptor  | 0.06% |
|       | t1/t2                     | Non-Receptor  | 0.04% |
| fALLF | GABA <sub>B</sub> x SPECT | GABAergic     | 0.06% |
|       | M <sub>3</sub> x GM       | Cholinergic   | 0.06% |
|       | $\alpha_4\beta_2$ x t1/t2 | Cholinergic   | 0.05% |
|       | 5HT <sub>2</sub> x MD     | Serotonergic  | 0.08% |
|       | 5HT <sub>1A</sub> x t1/t2 | Serotonergic  | 0.03% |
|       | GM                        | Non-Receptor  | 0.04% |
|       | FA                        | Non-Receptor  | 0.06% |
|       | t1/t2                     | Non-Receptor  | 0.04% |
| SPECT | AMPA                      | Glutamatergic | 0.04% |
|       | NMDA                      | Glutamatergic | 0.08% |
|       | Kainate                   | Glutamatergic | 0.12% |
|       | GABA <sub>B</sub> x GM    | GABAergic     | 0.05% |
|       | Bz site x fALLF           | GABAergic     | 0.05% |
|       | GABA <sub>B</sub> x FA    | GABAergic     | 0.07% |
|       | $\alpha_4\beta_2$ x SPECT | Cholinergic   | 0.14% |
|       | $\alpha_1$ x SPECT        | Adrenergic    | 0.04% |
|       | $\alpha_2$ x SPECT        | Adrenergic    | 0.07% |
|       | $\alpha_2$                | Adrenergic    | 0.09% |
|       | 5HT <sub>2</sub> x fALLF  | Serotonergic  | 0.09% |
|       | D <sub>1</sub> x FA       | Dopaminergic  | 0.03% |
| FA    | Kainate x GM              | Glutamatergic | 0.10% |
|       | NMDA x SPECT              | Glutamatergic | 0.10% |
|       | Kainate x FA              | Glutamatergic | 0.09% |
|       | Kainate                   | Glutamatergic | 0.12% |

Supplementary Information

|       |                           |               |       |
|-------|---------------------------|---------------|-------|
|       | GABA <sub>A</sub> x SPECT | GABAergic     | 0.04% |
|       | GABA <sub>B</sub>         | GABAergic     | 0.07% |
|       | $\alpha_1$ x GM           | Adrenergic    | 0.06% |
|       | $\alpha_2$ x fALLF        | Adrenergic    | 0.05% |
|       | $\alpha_1$ x SPECT        | Adrenergic    | 0.09% |
|       | $\alpha_1$ x t1/t2        | Adrenergic    | 0.06% |
|       | 5HT <sub>1A</sub>         | Serotonergic  | 0.08% |
|       | D <sub>1</sub> x MD       | Dopaminergic  | 0.07% |
| MD    | Kainate x MD              | Glutamatergic | 0.04% |
|       | Bz site x fALLF           | GABAergic     | 0.06% |
|       | Bz site x SPECT           | GABAergic     | 0.07% |
|       | GABA <sub>A</sub> x FA    | GABAergic     | 0.07% |
|       | Bz site x FA              | GABAergic     | 0.04% |
|       | GABA <sub>B</sub> x MD    | GABAergic     | 0.16% |
|       | Bz site                   | GABAergic     | 0.06% |
|       | GABA <sub>B</sub>         | GABAergic     | 0.06% |
|       | M <sub>2</sub> x fALLF    | Cholinergic   | 0.05% |
|       | M <sub>1</sub> x SPECT    | Cholinergic   | 0.03% |
|       | M <sub>2</sub> x FA       | Cholinergic   | 0.07% |
|       | M <sub>1</sub> x t1/t2    | Cholinergic   | 0.06% |
|       | M <sub>2</sub> x t1/t2    | Cholinergic   | 0.06% |
|       | M <sub>2</sub>            | Cholinergic   | 0.06% |
|       | M <sub>3</sub>            | Cholinergic   | 0.09% |
|       | $\alpha_2$ x fALLF        | Adrenergic    | 0.04% |
|       | 5HT <sub>1A</sub> x GM    | Serotonergic  | 0.05% |
|       | 5HT <sub>1A</sub> x t1/t2 | Serotonergic  | 0.04% |
|       | 5HT <sub>2</sub>          | Serotonergic  | 0.06% |
|       | D <sub>1</sub> x SPECT    | Dopaminergic  | 0.07% |
|       | t1/t2                     | Non-Receptor  | 0.06% |
| t1/t2 | AMPA x SPECT              | Glutamatergic | 0.07% |
|       | NMDA x FA                 | Glutamatergic | 0.07% |
|       | GABA <sub>A</sub> x GM    | GABAergic     | 0.04% |
|       | GABA <sub>B</sub> x GM    | GABAergic     | 0.04% |
|       | Bz site x SPECT           | GABAergic     | 0.06% |
|       | GABA <sub>B</sub> x SPECT | GABAergic     | 0.05% |
|       | M <sub>1</sub> x GM       | Cholinergic   | 0.08% |
|       | M <sub>3</sub> x GM       | Cholinergic   | 0.14% |
|       | M <sub>2</sub> x SPECT    | Cholinergic   | 0.04% |
|       | $\alpha_4\beta_2$ x MD    | Cholinergic   | 0.06% |
|       | M <sub>1</sub>            | Cholinergic   | 0.16% |
|       | M <sub>3</sub>            | Cholinergic   | 0.15% |

Supplementary Information

|  |                        |              |       |
|--|------------------------|--------------|-------|
|  | $\alpha_1$ x GM        | Adrenergic   | 0.03% |
|  | $\alpha_1$ x SPECT     | Adrenergic   | 0.07% |
|  | $\alpha_1$ x FA        | Adrenergic   | 0.04% |
|  | $\alpha_1$ x MD        | Adrenergic   | 0.08% |
|  | 5HT <sub>2</sub> x GM  | Serotonergic | 0.07% |
|  | 5HT <sub>2</sub> x MD  | Serotonergic | 0.05% |
|  | D <sub>1</sub> x MD    | Dopaminergic | 0.06% |
|  | D <sub>1</sub> x t1/t2 | Dopaminergic | 0.07% |
|  | GM                     | Non-Receptor | 0.06% |

**Supplementary Table S7:** Total MCM parameter-clinical co-variance explained by receptor type in PD patients (via each SVD component).

| Receptor Type | Total variance explained in the primary component | Total variance explained in the secondary component |
|---------------|---------------------------------------------------|-----------------------------------------------------|
| Glutamatergic | 4.85%                                             | 1.19%                                               |
| GABAergic     | 5.97%                                             | 1.24%                                               |
| Cholinergic   | 4.77%                                             | 1.74%                                               |
| Adrenergic    | 2.02%                                             | 0.88%                                               |
| Serotonergic  | 3.77%                                             | 0.75%                                               |
| Dopaminergic  | 1.16%                                             | 0.53%                                               |

**Supplementary Table S8:** Performance gain due to the inclusion of receptor maps, and the p-value from a two-sample t-test for each modality, across all (N=71) subjects.

| Imaging Modality | Average Gain in R <sup>2</sup> | P-value                  |
|------------------|--------------------------------|--------------------------|
| GM               | 35.6% ± 10.8%                  | P=1.16×10 <sup>-27</sup> |
| fALFF            | 18.8% ± 8.0%                   | P=7.22×10 <sup>-13</sup> |
| SPECT            | 20.2% ± 12.4%                  | P=1.38×10 <sup>-9</sup>  |
| FA               | 21.7% ± 11.8%                  | P=5.87×10 <sup>-11</sup> |
| MD               | 19.0% ± 9.1%                   | P=1.69×10 <sup>-9</sup>  |
| t1/t2            | 17.1% ± 9.3%                   | P=5.83×10 <sup>-9</sup>  |

**Supplementary Table S9:** *Performance gain due to true receptor distributions over null maps, and p-value of the true receptor data model belonging to the null distribution, using Fisher's method to combine p-values across all (N=71) subjects.*

| <b>Imaging Modality</b> | <b>Average Gain in R<sup>2</sup></b> | <b>P-value</b>        |
|-------------------------|--------------------------------------|-----------------------|
| <b>GM</b>               | 13.4% ± 5.3%                         | P=2×10 <sup>-16</sup> |
| <b>fALFF</b>            | 7.3% ± 4.5%                          | P=2×10 <sup>-16</sup> |
| <b>SPECT</b>            | 6.7% ± 4.3%                          | P=2×10 <sup>-16</sup> |
| <b>FA</b>               | 7.5% ± 5.3%                          | P=2×10 <sup>-16</sup> |
| <b>MD</b>               | 5.3% ± 4.0%                          | P=2×10 <sup>-16</sup> |
| <b>t1/t2</b>            | 6.0% ± 3.5%                          | P=2×10 <sup>-16</sup> |

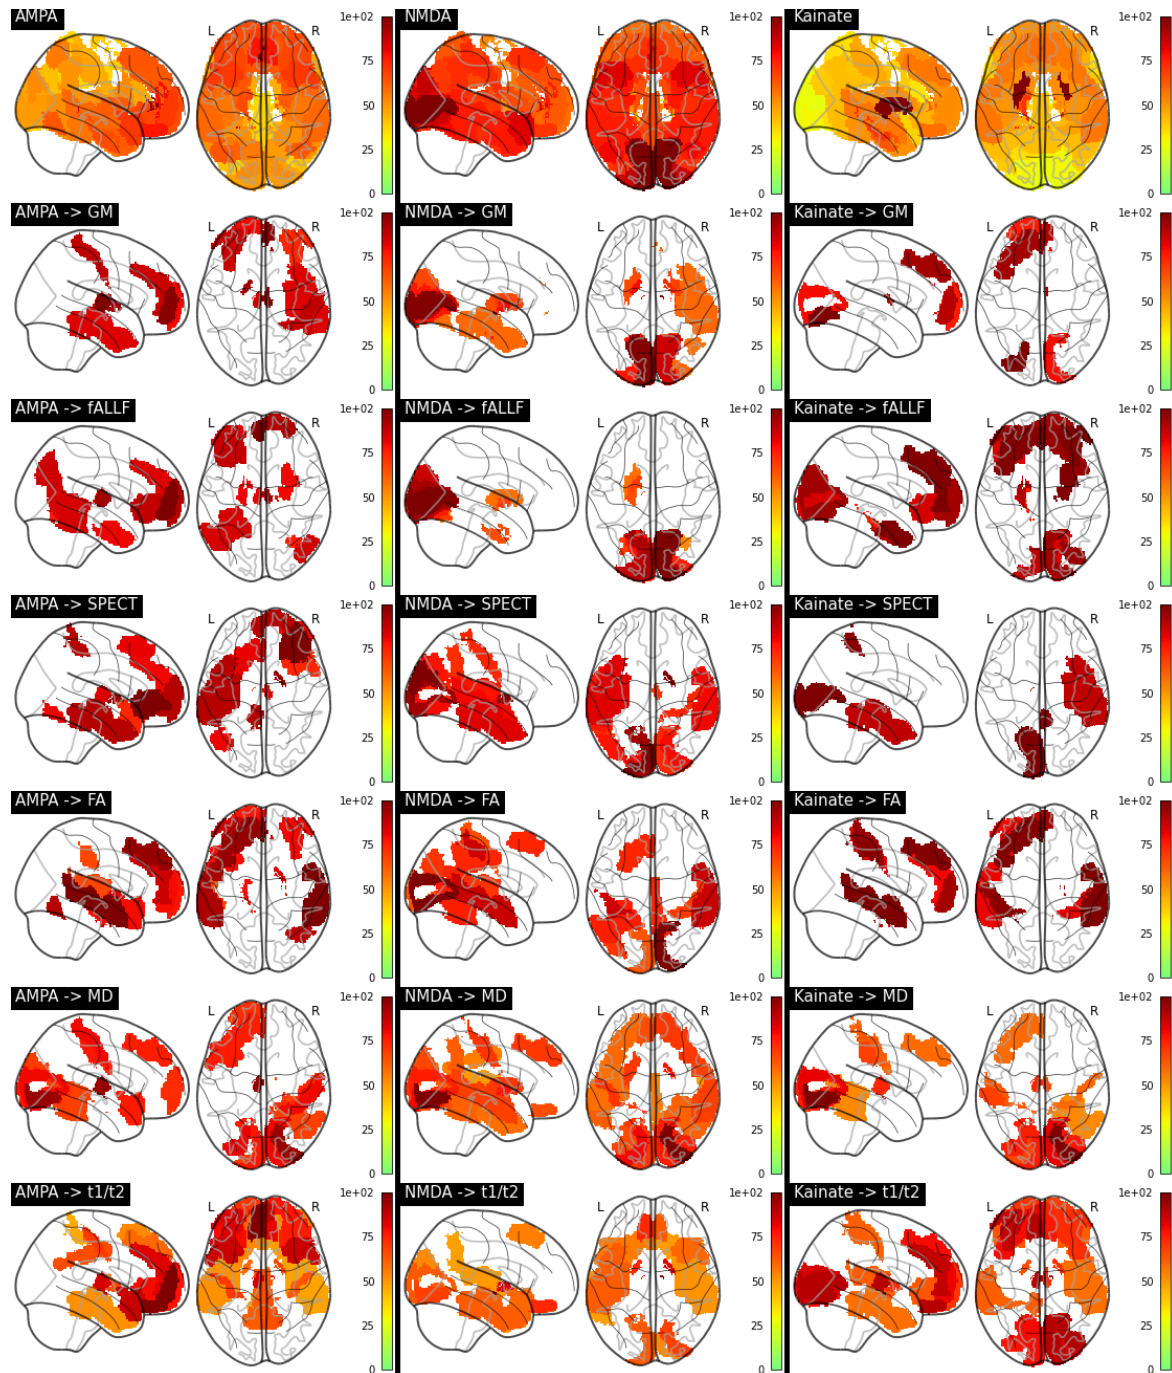

**Supplementary Figure S1: Glutamatergic receptor influence maps.** The first row shows the densities of AMPA, NMDA and kainate receptors, with remaining rows showing their influence on gray matter density (GM), fractional amplitude of low frequency fluctuations (fALFF) from rs-fMRI, dopaminergic transporter (DAT) SPECT density, fractional anisotropy (FA), mean diffusivity (MD) and t1/t2 ratio. All maps are re-scaled to arbitrary units for visualization, and show only regions with significant z-scores ( $P < 0.05$ ) of Wilcoxon rank-sum statistics relative to the Wilcoxon statistics due to null distributions (1000 iterations with permuted receptor maps).

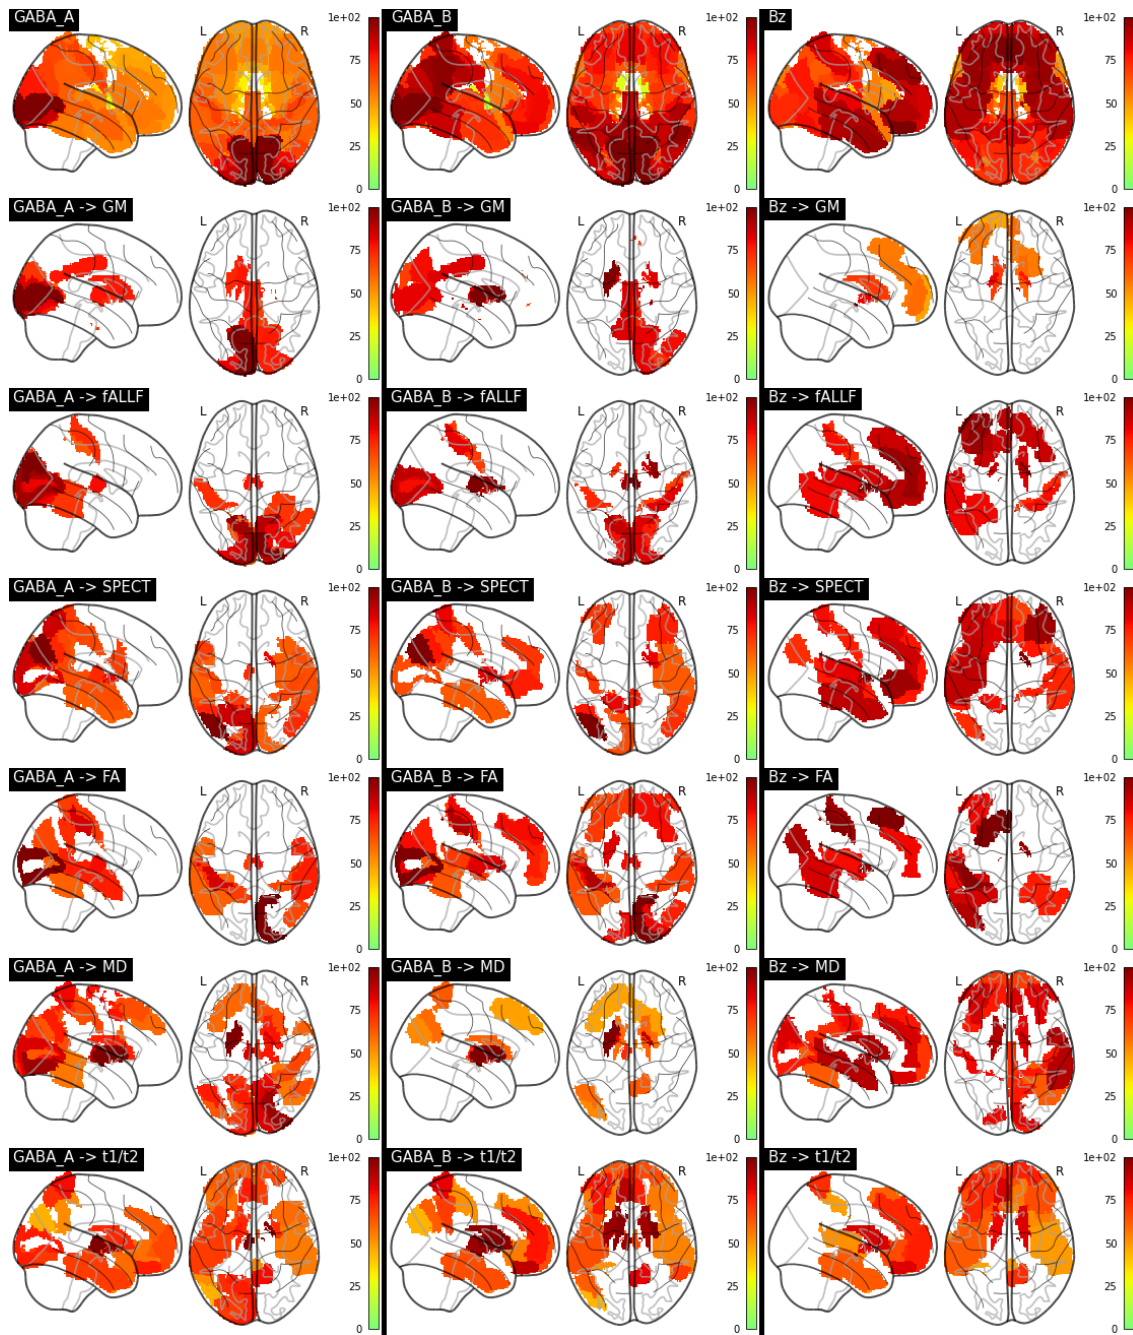

**Supplementary Figure S2:** *GABAergic receptor influence on imaging modalities. The first row shows density maps for GABA<sub>A</sub>, GABA<sub>B</sub> and the Bz binding site, with remaining rows showing receptor influence maps for each imaging modality, including gray matter density (GM), fractional amplitude of low frequency fluctuations (fALLF) from rs-fMRI, dopaminergic transporter (DAT) SPECT density, fractional anisotropy (FA), mean diffusivity (MD) and t1/t2 ratio. All maps are re-scaled to arbitrary units for visualization, and show only regions with significant z-scores ( $P < 0.05$ ) of Wilcoxon rank-sum statistics relative to the Wilcoxon statistics due to null distributions (1000 iterations with permuted receptor maps).*

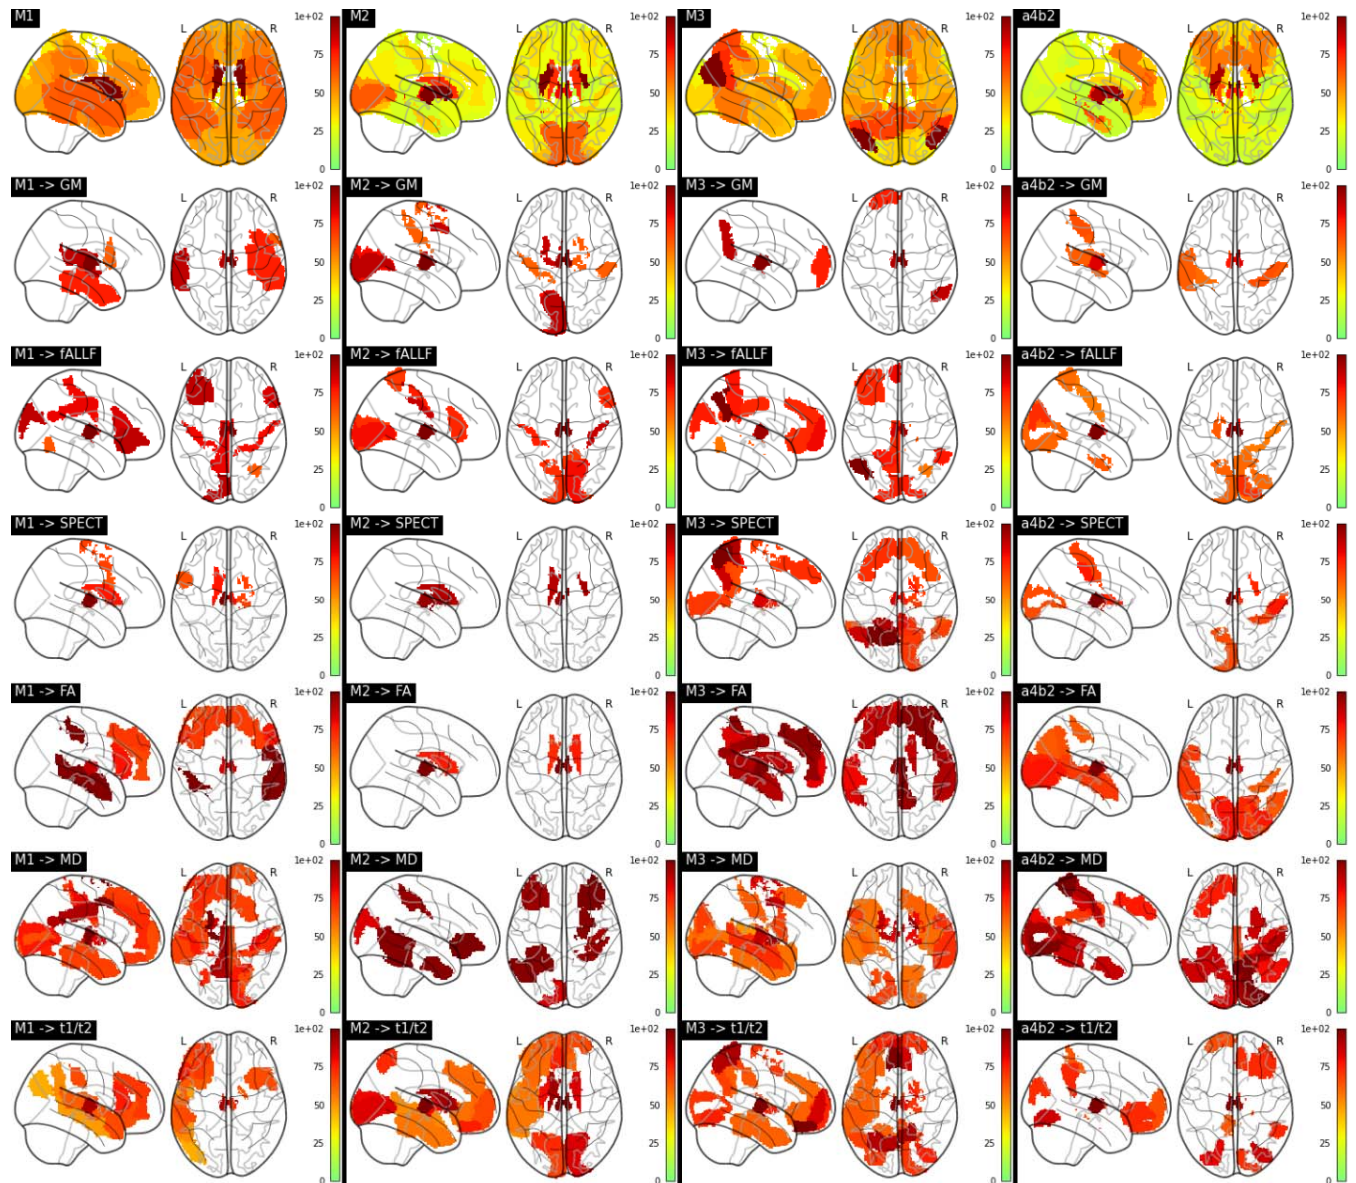

**Supplementary Figure S3:** Cholinergic receptor influence maps. The first row shows the densities of the muscarinic  $M_1$ ,  $M_2$  and  $M_3$ , and cholinergic  $\alpha_4\beta_2$  receptors, with remaining rows showing receptor influence maps for each imaging modality, including gray matter density (GM), fractional amplitude of low frequency fluctuations (fALFF) from rs-fMRI, dopaminergic transporter (DAT) SPECT density, fractional anisotropy (FA), mean diffusivity (MD) and  $t_1/t_2$  ratio. All maps are re-scaled to arbitrary units for visualization, and show only regions with significant z-scores ( $P < 0.05$ ) of Wilcoxon rank-sum statistics relative to the Wilcoxon statistics due to null distributions (1000 iterations with permuted receptor maps).



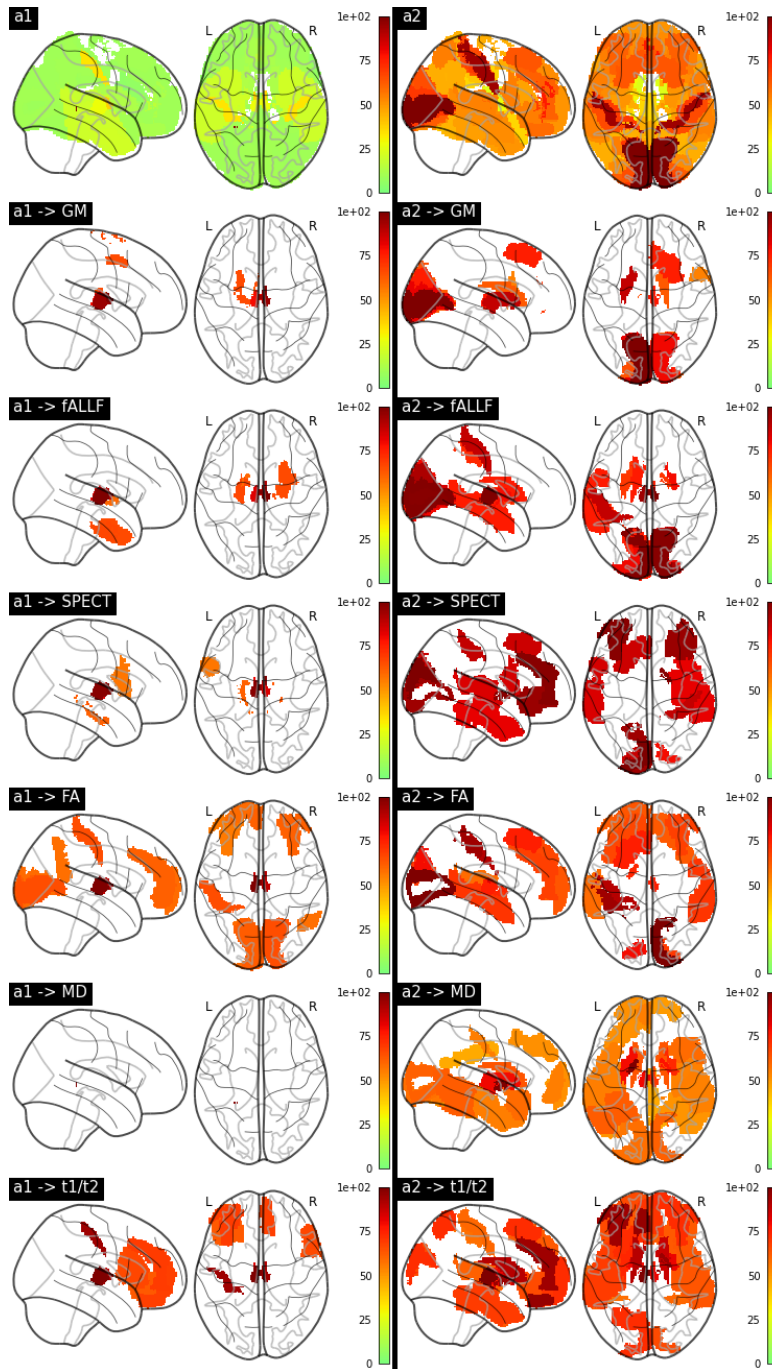

**Supplementary Figure S4: Adrenergic receptor influence maps.** The first row shows  $\alpha_1$  and  $\alpha_2$  receptor density maps, with remaining rows showing receptor influence maps for each imaging modality, including gray matter density (GM), fractional amplitude of low frequency fluctuations (fALFF) from rs-fMRI, dopaminergic transporter (DAT) SPECT density, fractional anisotropy (FA), mean diffusivity (MD) and  $t_1/t_2$  ratio. All maps are re-scaled to arbitrary units for visualization, and show only regions with significant z-scores ( $P < 0.05$ ) of Wilcoxon rank-sum statistics relative to the Wilcoxon statistics due to null distributions (1000 iterations with permuted receptor maps).

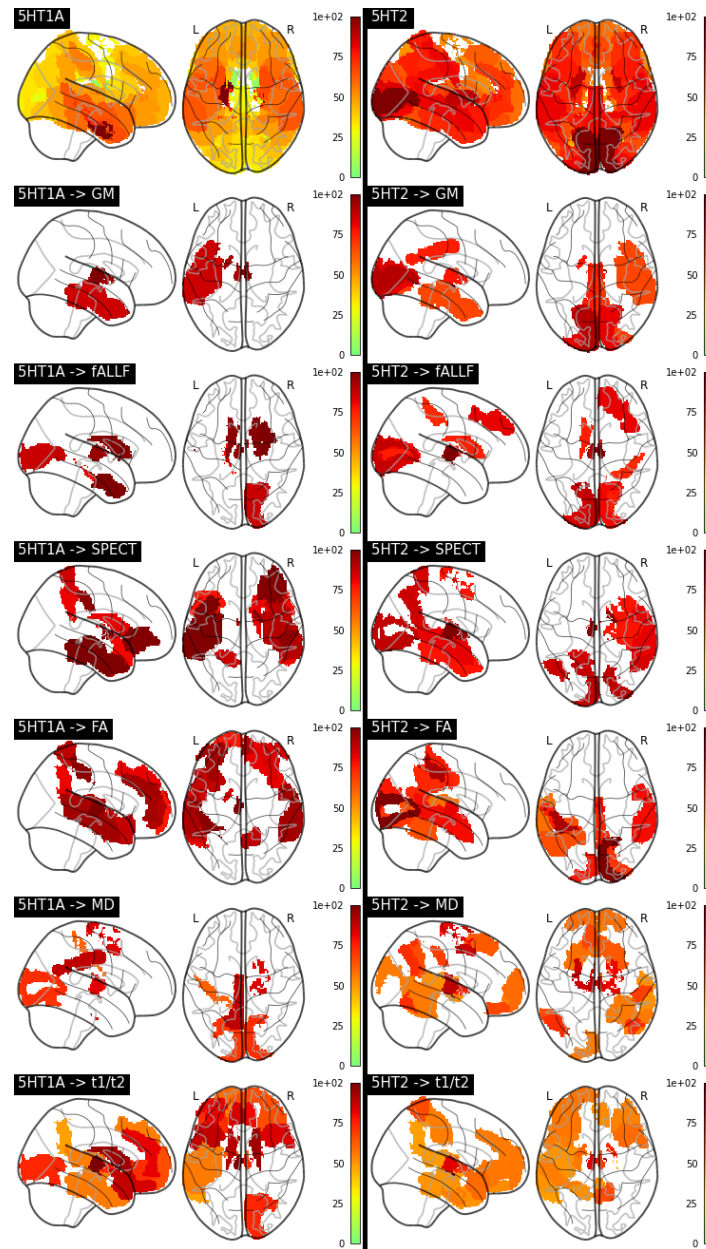

**Supplementary Figure S5:** Serotonergic receptor influence maps. The first row shows the 5HT<sub>1A</sub> and 5HT<sub>2</sub> serotonergic receptor density maps, with remaining rows showing receptor influence maps on gray matter density (GM), fractional amplitude of low frequency fluctuations (fALFF) from rs-fMRI, dopaminergic transporter (DAT) SPECT density, fractional anisotropy (FA), mean diffusivity (MD) and t<sub>1</sub>/t<sub>2</sub> ratio. All maps are re-scaled to arbitrary units for visualization, and show only regions with significant z-scores ( $P < 0.05$ ) of Wilcoxon rank-sum statistics relative to the Wilcoxon statistics due to null distributions (1000 iterations with permuted receptor maps).

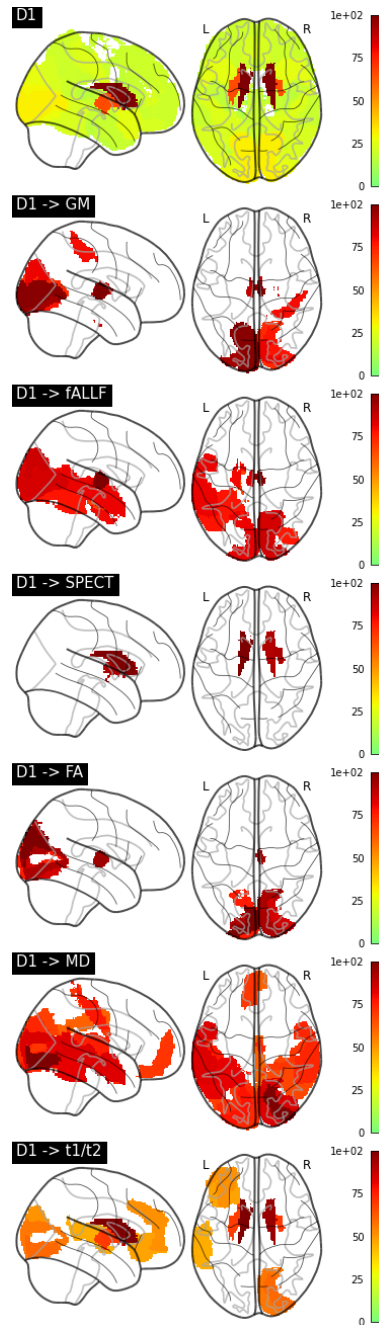

**Supplementary Figure S6:** Dopaminergic receptor influence maps. The first row shows the  $D_1$  dopaminergic receptor density, with remaining rows showing its influence on each imaging modality, which include gray matter density (GM), fractional amplitude of low frequency fluctuations (fALFF) from rs-fMRI, dopaminergic transporter (DAT) SPECT density, fractional anisotropy (FA), mean diffusivity (MD) and  $t1/t2$  ratio. All maps are re-scaled to arbitrary units for visualization, and show only regions with significant z-scores ( $P < 0.05$ ) of Wilcoxon rank-sum statistics relative to the Wilcoxon statistics due to null distributions (1000 iterations with permuted receptor maps).
